# Supplementary material for: Let It Beat: How Lifestyle and Psychosocial Factors Affect the Risk of Sudden Cardiac Death—A 10-Year Follow-Up Study
Source: MDPI journal article supplement (doi:10.3390/ijerph19052627), 2022-02-24
Supplement: s1 [file s1]

## QUESTIONNAIRE

Instruction: Please write down or circle the most appropriate response.

What is your year of birth? .....

What is your gender?            Male  
                                         Female

Write your height and weight, please.....cm.....kg

What is your highest level of education?        Elementary  
                                                                 High school  
                                                                 College/University

What is your occupation?        Employee - please specify.....  
                                         Self-employed  
                                         Disability pension  
                                         Old-age pension  
                                         Unemployed - please specify how long .....  
                                         Student  
                                         Other - please specify.....

What is your marital status?        Single  
                                         Married  
                                         Divorced  
                                         Widowed  
                                         Other - please specify.....

Please list the diseases you are being treated for:

.....  
.....  
.....

Please list the medicines you are taking:

.....  
.....  
.....

Do you have coronary artery disease (a narrowing or blockage of the coronary arteries usually caused by atherosclerosis)? Have you had a heart attack? Have you suffered from angina pectoris?

Yes  
No

Has there been a sudden cardiac death or an unexplained death at a young age in your family?

Yes - please specify in whom and at what age .....  
No

**Have you had any major life event in the last year** (for example death of a loved one, increase in partner quarrels, divorce or separation, violence, major intrafamily conflict, major personal injury or illness, death or major illness of a close family member, a new family member, loss of job or retirement, higher indebtedness, marriage, change residence, extraordinary personal success, etc.)?

- Yes
- No

**Do you feel stress at home (feeling irritable, filled with anxiety, or having sleeping difficulties as a result of conditions at home)?**

- Never
- Sometimes
- Often
- Permanently

**Do you feel stress at work (feeling irritable, filled with anxiety, or having sleeping difficulties as a result of conditions at work)?**

- Never
- Sometimes
- Often
- Permanently

**Do you feel financial stress?**

- Never
- Sometimes
- Often
- Permanently

**Do you smoke?**

- Yes, I do
- No, I have never smoked
- No, I have stopped - please specify how long.....

**How often do you sport? (30 minutes to sweat)**

- Less than once a week
- Once or twice a week
- At least three times per week

**How much of your free time do you spend in front of a TV or computer screen?**

- Not at all
- Less than 1 hour a day
- Less than 2 hours a day
- More than 2 hours a day

**Thank you for completing the questionnaire.**
